# Supplementary material for: Altered Regional Cerebral Blood Flow Associated with Mood and Sleep in Shift Workers: Cerebral Perfusion Magnetic Resonance Imaging Study
Source: PubMed Central journal article supplement — J Clin Neurol. 2019 Jul 4;15(4):438–47. doi: 10.3988/jcn.2019.15.4.438 (PMC6785470; doi:10.3988/jcn.2019.15.4.438), 2019-07-04
Supplement: jcn-15-438-s001.pdf [file jcn-15-438-s001.pdf]

**Supplementary Table 1.** Cognitive function assessed using the Joggle test

|                                         | Day workers (n=15) | Shift workers (n=15) | p      |
|-----------------------------------------|--------------------|----------------------|--------|
| <b>Motor praxis task</b>                |                    |                      |        |
| Response time, s                        | 583.1±89.3         | 560.7±73.9           | 0.389  |
| Score                                   | 989 (982–992)      | 988 (983–989)        | 0.412* |
| <b>Visual object learning task</b>      |                    |                      |        |
| Response time, s                        | 2,406.4±817.2      | 2,487.2±738.9        | 0.653  |
| Score                                   | 553.1±116.0        | 555.5±130.5          | 0.935  |
| <b>n-back test</b>                      |                    |                      |        |
| Response time, s                        | 615.2±184.0        | 654.9±67.2           | 0.838  |
| Score                                   | 491 (360–627)      | 403 (318–627)        | 0.567* |
| <b>Abstract matching task</b>           |                    |                      |        |
| Response time, s                        | 2,422.8±1,073.5    | 3,052.5±2,355.1      | 0.389  |
| Score                                   | 476.1±107.0        | 495.7±114.8          | 0.624  |
| <b>Line orientation task</b>            |                    |                      |        |
| Response time, s                        | 6,020.0±1,794.7    | 6,768.3±2,535.1      | 0.202  |
| Score                                   | 788.7±106.3        | 764.9±123.0          | 0.567  |
| <b>Digital symbol substitution task</b> |                    |                      |        |
| Response time, s                        | 929.5±90.7         | 947.2±84.1           | 0.567  |
| Score                                   | 965.3±28.7         | 956.4±42.0           | 0.713  |
| <b>Balloon analog risk task</b>         |                    |                      |        |
| Response time, s                        | 390.9±173.5        | 322.5±131.4          | 0.252  |
| Score                                   | 870.3±144.9        | 893.6±146.2          | 0.747  |
| <b>Psychomotor vigilance test</b>       |                    |                      |        |
| 1/response time, s                      | 4.2±0.6            | 3.9±1.2              | 0.713  |
| Number of lapses                        | 4.7±7.1            | 3.3±4.8              | 0.389  |
| False starts, n                         | 1.0±0.9            | 1.3±1.4              | 0.653  |

Data are mean±standard-deviation or median (interquartile range) values.

\*Mann-Whitney U test.
